# Supplementary material for: Structure and magnetic properties of tri- and hexa-nuclear hydroxo-bridged copper(ii) complexes formed by a trimacrocyclic derivative of 1,4,7-triazacyclononane
Source: Royal Society of Chemistry journal article supplement (doi:10.1039/b105595j), 2002-01-01
Supplement: b105595j.doc [file b105595j.doc]

Supplementary Figure To:

Structure and Magnetic Properties of Tri- and Hexa-nuclear Hydroxo-Bridged Copper(II) Complexes Formed by a Trimacrocyclic Derivative of 1,4,7-Triazacyclononane

**Bim Graham,aLeone Spiccia,a *** **Gary D. Fallon,a** **Milton T. W. Hearn,b Frank E. Mabbs,c Boujemaa Moubaraki a** **and Keith S. Murray a**

*aSchool of Chemistry, P. O. Box 23, Monash University, Victoria 3800, Australia*

*b* *Centre for Bioprocess Technology, Department of Biochemistry, P.O. Box 130, Monash University, Victoria 3800, Australia*

*c Department of Chemistry, University of Manchester, Manchester M13 9PL, UK.*

* *Corresponding author*: e-mail: [leone.spiccia@sci.monash.edu.au](mailto:leone.spiccia@sci.monash.edu.au)

fax: 61 3 9905 4597 Phone: +61 3 9905 4526

**Figure Caption** Q-band EPR spectra (34.1 GHz) measured on a powder sample of {[Cu3L(µ2-OH)(µ3-HPO4)(H2O)](PF6)3·3H2O}n at: (a) 200 K; (b) 114 K; (c) 4 K.

**(a)**

**(b)**

(c)
